# Supplementary material
Source: PubMed Central journal article supplement (PMC3017162)
Supplement: 1017547108_pnas.201017547SI.pdf [file 1017547108_pnas.201017547SI.pdf]

# Supporting Information

Österreicher et al. 10.1073/pnas.1017547108

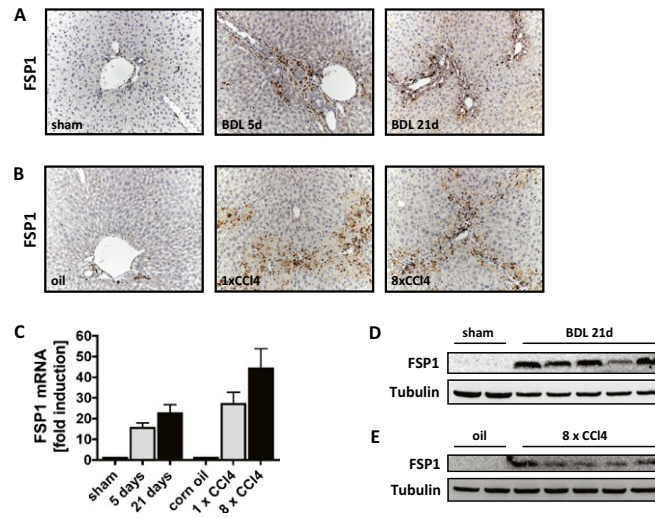

**Fig. S1.** FSP1 is increased in experimental liver injury. C57BL6 mice were subjected to BDL for 5 or 21 d or given 1 or 8 injections of CCl<sub>4</sub>. FSP1 expression in livers of these mice was evaluated by immunohistochemistry (A and B), qPCR (C), and immunoblotting (D and E).

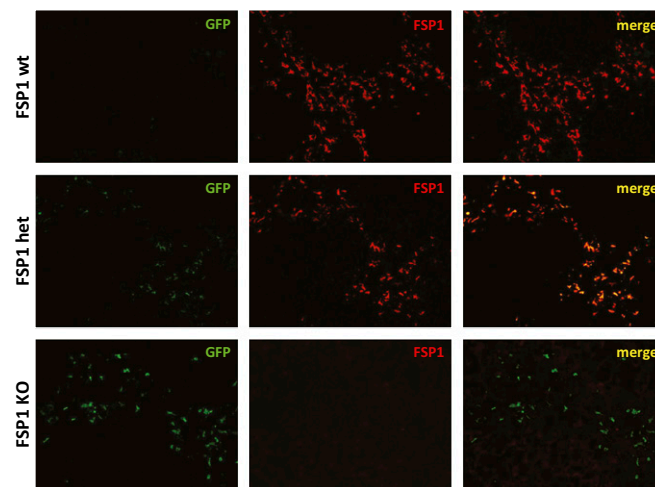

**Fig. S2.** Specificity of FSP1 antibody. FSP1 KO mice were generated by replacing the genomic FSP1 locus with a GFP cassette, creating a GFP knockin that serves as a reporter. FSP1 KO, heterozygous and WT mice were subjected to a single injection of CCl<sub>4</sub>, their livers were isolated and analyzed by immunofluorescence for FSP1 and GFP expression. Whereas FSP1 KO mice lacked FSP1 staining, FSP1 and GFP were colocalized in heterozygous mice. WT mice did not express GFP.

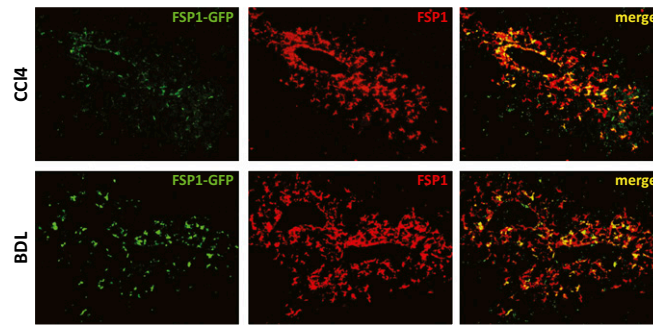

**Fig. S3.** FSP1 expression in FSP1-GFP reporter mice. FSP1-GFP reporter mice in which the FSP1 promoter drives expression of GFP were subjected to BDL or CCl<sub>4</sub> treatment and evaluated for FSP1 expression by immunofluorescence. Colocalization of FSP1 and GFP was observed indicating that the FSP1-GFP reporter reflects FSP1 expression in vivo.

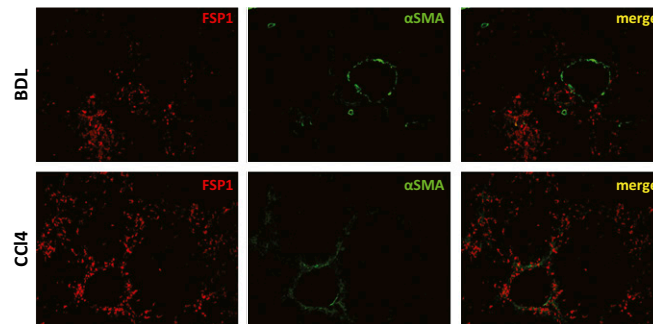

**Fig. S4.** Double immunofluorescence staining for FSP1 and  $\alpha$ SMA in mice. Mice were subjected to BDL or CCl<sub>4</sub> treatment, and liver sections were analyzed by immunofluorescence staining for FSP1 and  $\alpha$ SMA expression. No colocalization of FSP1 and  $\alpha$ SMA was observed.

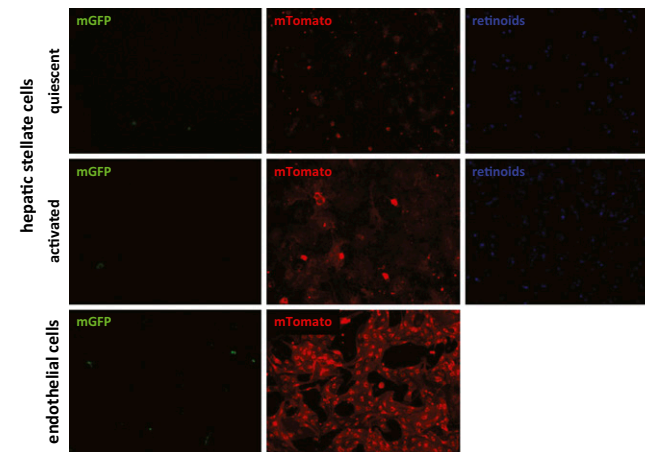

**Fig. S5.** Hepatic stellate cells or liver sinusoidal endothelial cells never express FSP1. FSP1-Cre mice in which the FSP1 promoter drives expression of Cre recombinase were crossed to reporter mice in which the ROSA26 promoter drives expression of a membrane-targeted GFP after Cre-mediated removal of a loxP-flanked red fluorescent protein. HSCs were isolated and activated by adhesion to plastic. Cells were analyzed for green (mGFP), red (mTomato), and blue (retinoids) fluorescence 1 d after plating and after 5 d in culture. Liver sinusoidal endothelial cells were isolated and cultured on collagen-coated dishes and analyzed for expression of GFP indicating Cre activity.
